# Supplementary material
Source: publisher figshare collection journal article supplement (https://acs.figshare.com/ndownloader/files/4504945)
Supplement: Supplementary file 1 [file 4504945]

## **Supporting Information**

### **Supercapacitive Properties of PEDOT and Carbon Colloidal Microspheres**

*Timothy L. Kelly,<sup>†</sup> Kazuhisa Yano,<sup>‡</sup> and Michael O. Wolf<sup>\*†</sup>*

Department of Chemistry, University of British Columbia, Vancouver, BC, V6T 1Z1,  
Canada, and Toyota Central R & D Labs, Inc., Nagakute, Aichi, 480-1192, Japan

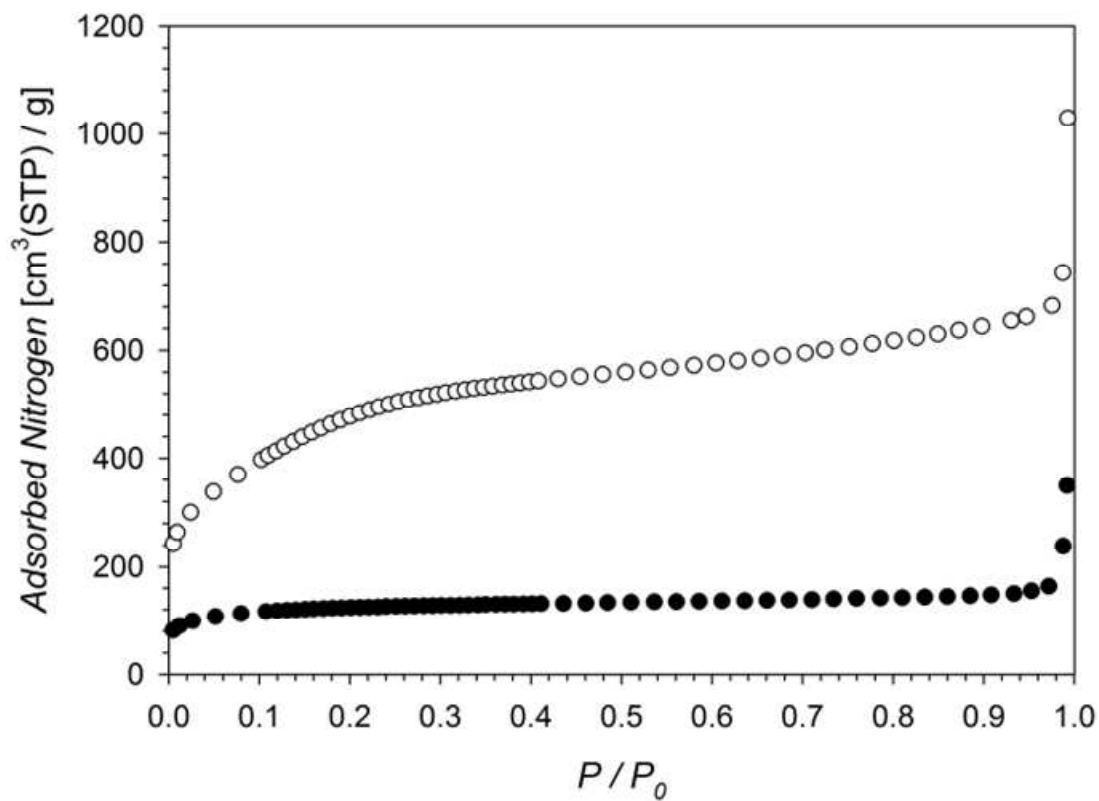

**Figure S1.** Nitrogen adsorption isotherms for the microporous carbon spheres (hollow circles) and the PEDOT@carbon composite (solid circles).

**Table S1.** EDX data for the microporous carbon and PEDOT@carbon microspheres.

| Sample                        | %C<br>[w/w] | %O<br>[w/w] | %S<br>[w/w] |
|-------------------------------|-------------|-------------|-------------|
| Microporous<br>Carbon Spheres | 91          | 9           | N/A         |
| PEDOT@carbon                  | 68          | 20          | 12          |

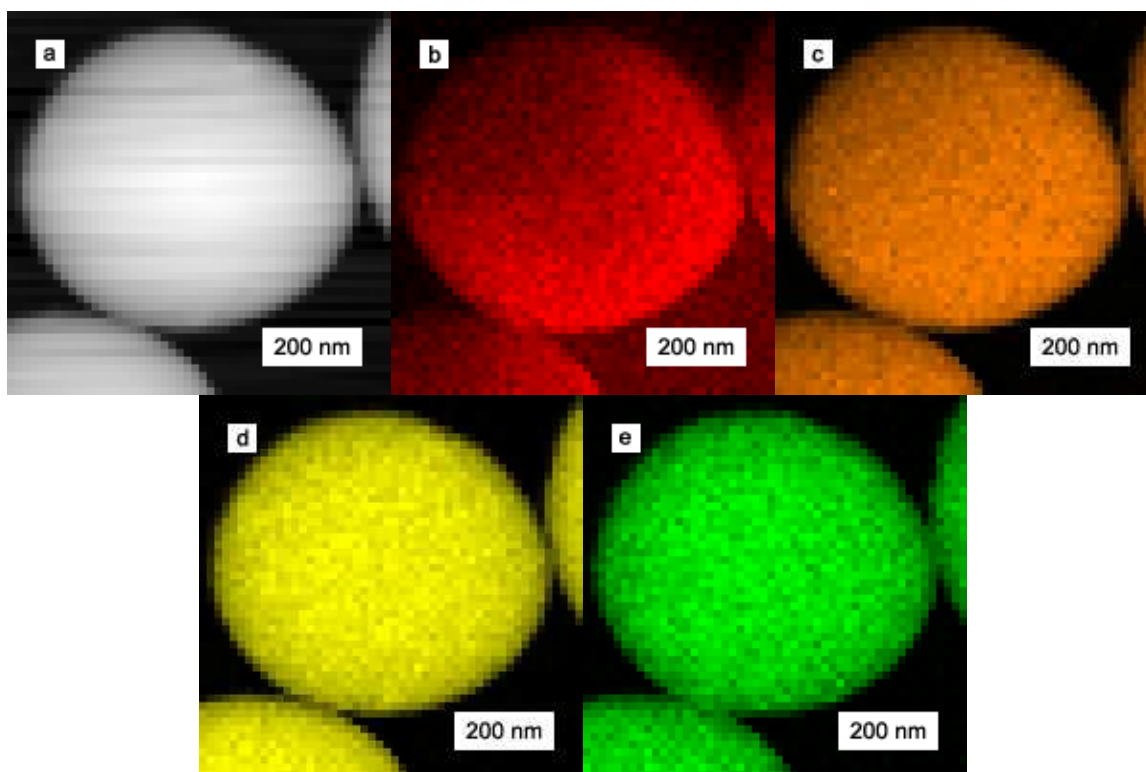

**Figure S2.** STEM-EDX analysis of a single PEDOT@silica microsphere: (a) HAADF detector image; (b) carbon K-line image; (c) oxygen K-line image; (d) silicon K-line image; (e) sulfur K-line image. The sulfur distribution within the microparticle (and thus, PEDOT distribution) appears to be homogeneous and correlate well with the intensities of both the overall secondary electron signal (HAADF detector) as well as the other elements.

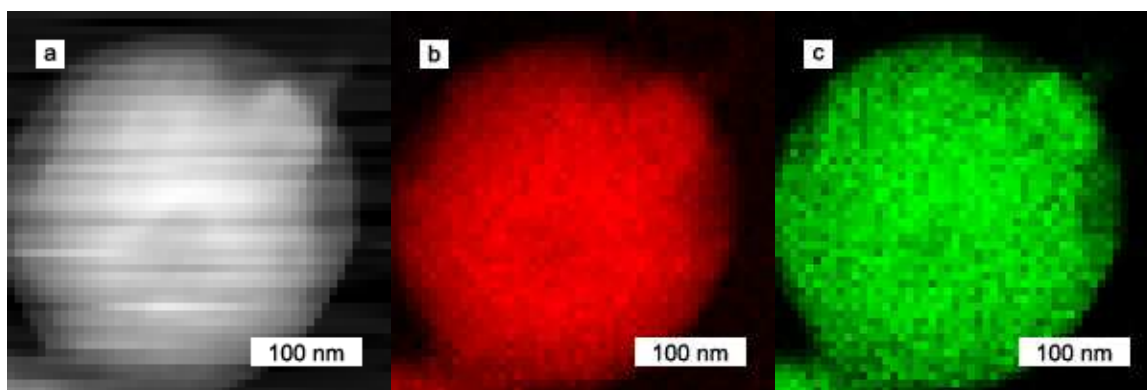

**Figure S3.** STEM-EDX analysis of a single PEDOT@carbon microsphere: (a) HAADF detector image; (b) carbon K-line image; (c) sulfur K-line image. The sulfur distribution within the microparticle (and thus, PEDOT distribution) appears to be homogeneous and correlate well with the intensities of both the overall secondary electron signal (HAADF detector) and the carbon K-line signal. The oxygen K-line signal was too weak to be mapped in this sample.
